# Supplementary material for: Head and neck squamous cell carcinoma-specific prognostic signature and drug sensitive subtypes based on programmed cell death-related genes
Source: PeerJ journal article supplement (doi:10.7717/peerj.16364), 2023-11-21

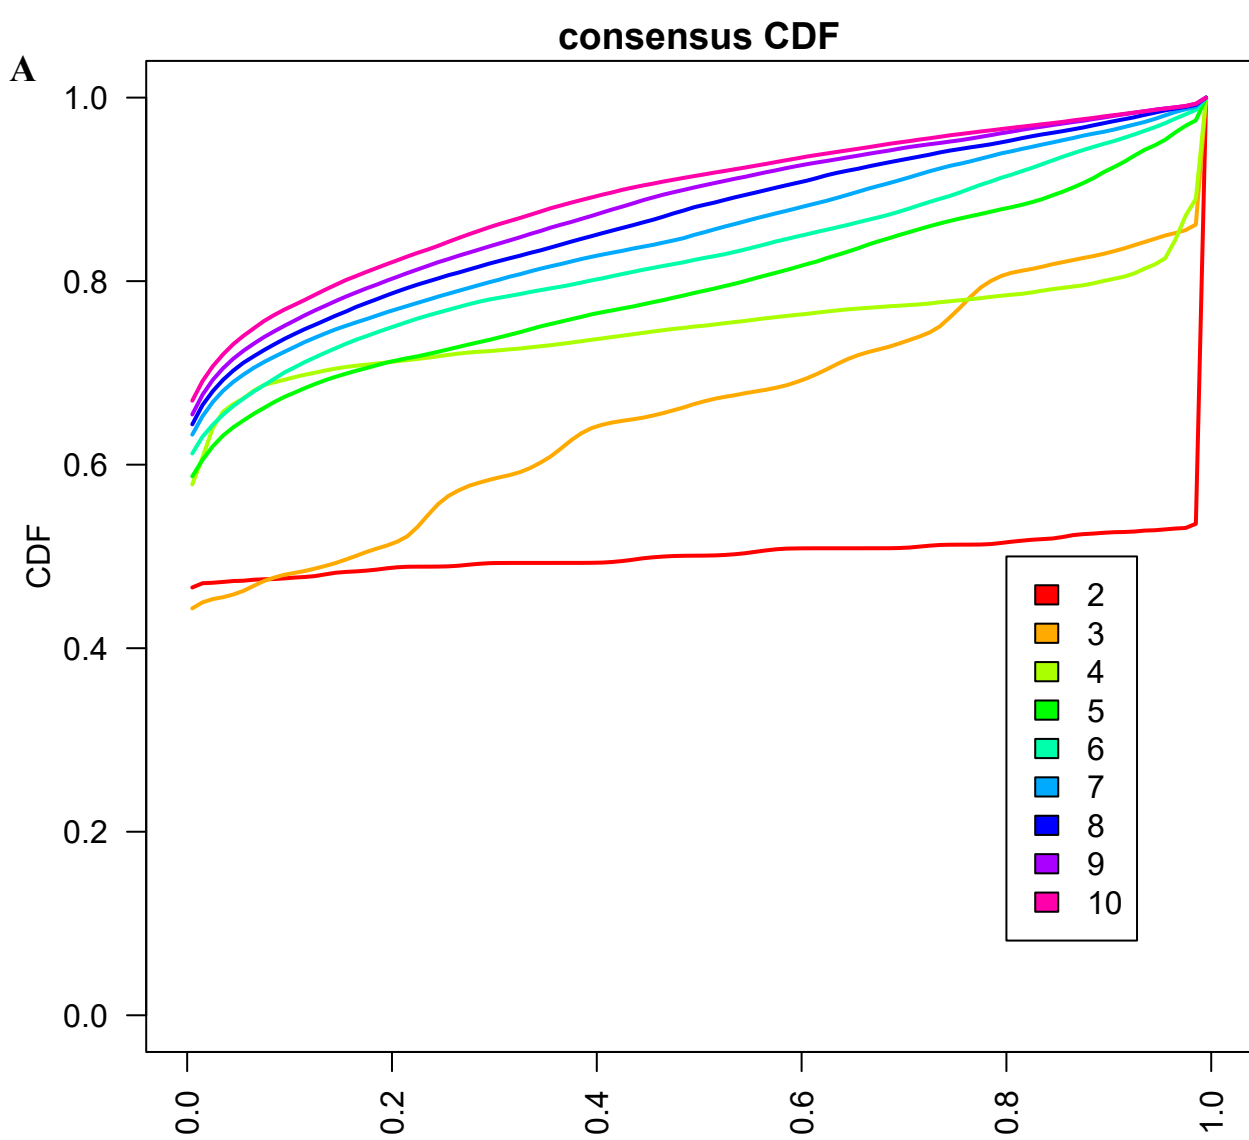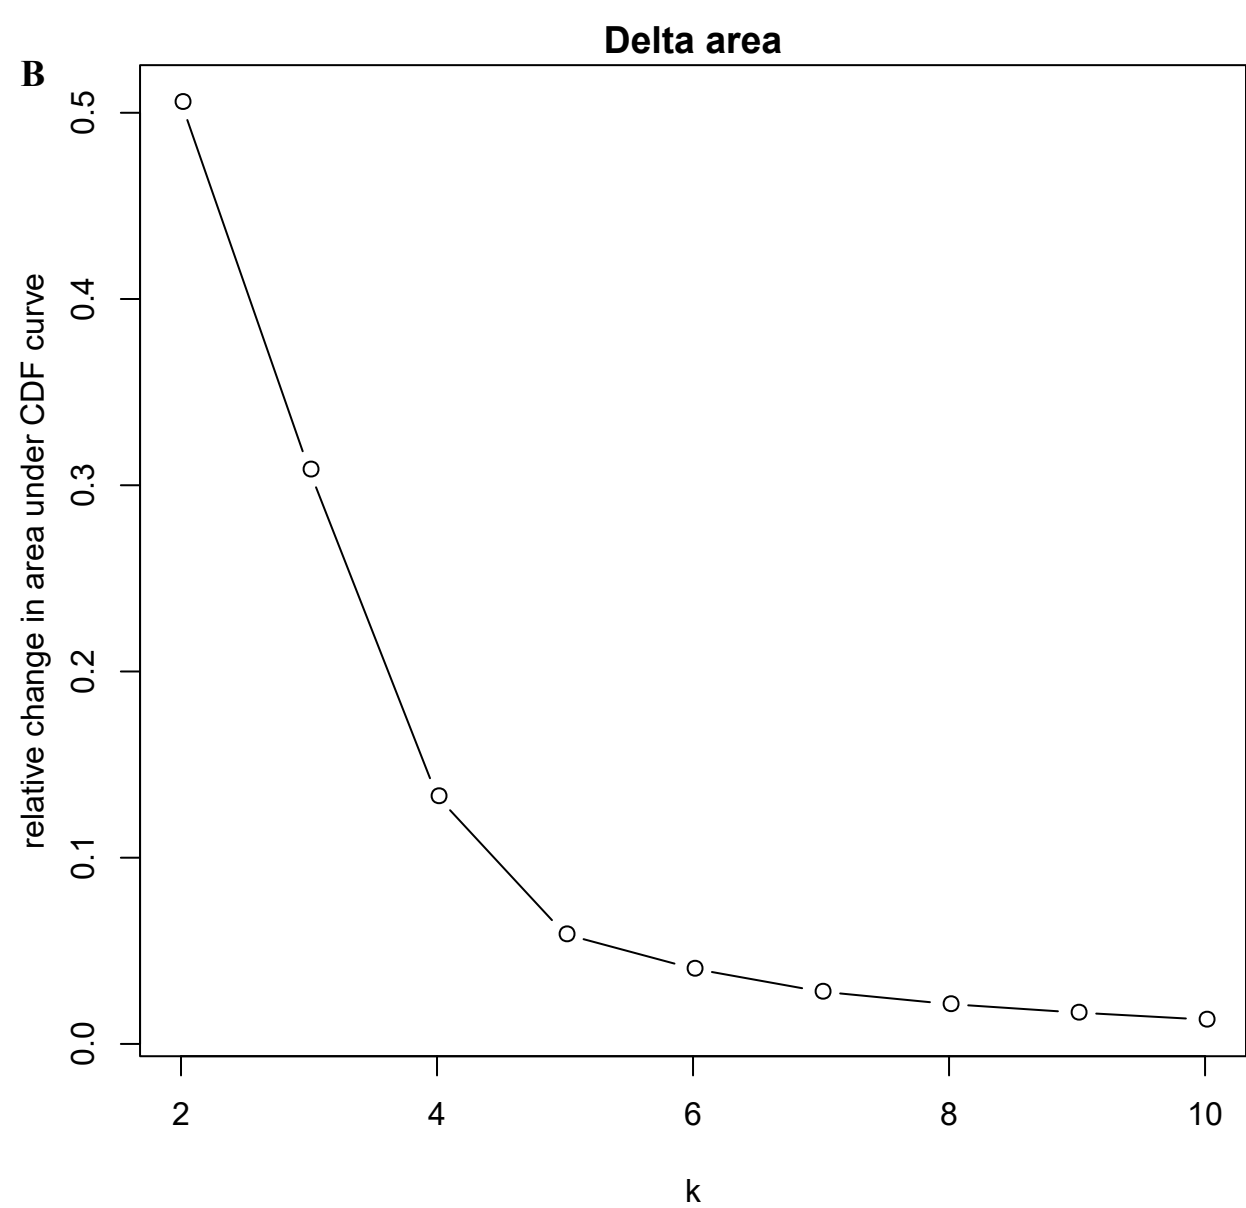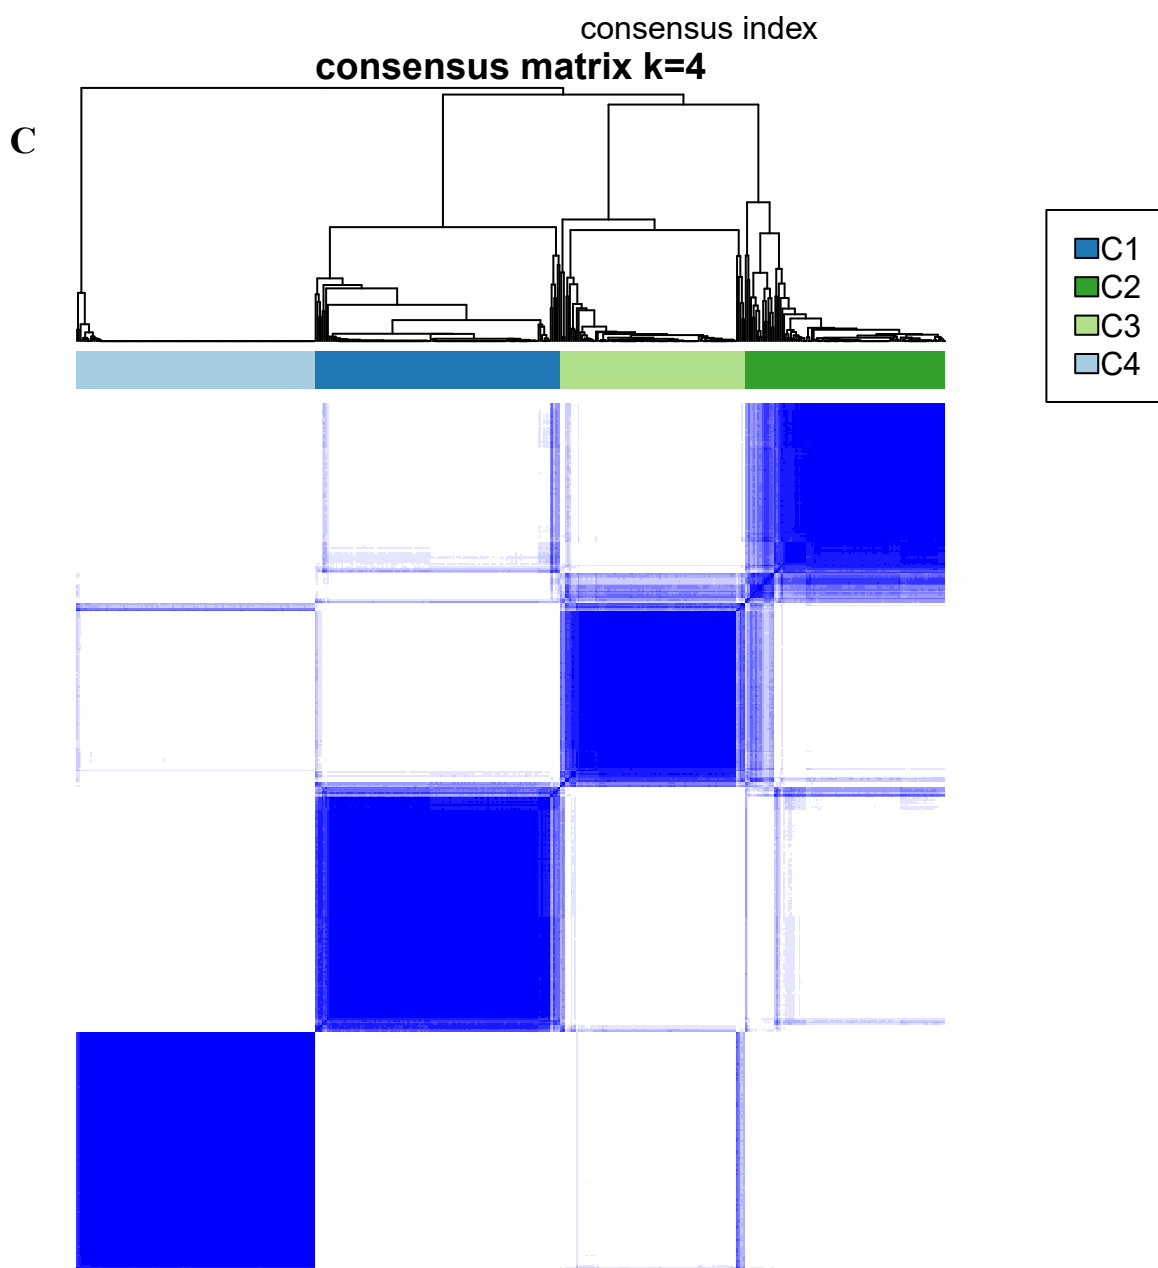

Supplement: FigS3.pdf [file FigS3.pdf]
